# Supplementary material for: Assessing the Various Antagonistic Mechanisms of Trichoderma Strains against the Brown Root Rot Pathogen Pyrrhoderma noxium Infecting Heritage Fig Trees
Source: MDPI journal article supplement (doi:10.3390/jof8101105), 2022-10-19
Supplement: s1 [file s1]

Supplementary Materials

**Table S1.** Primer pairs used for gene expression analysis by qPCR technique.

| Gene        | Transcript ID<br><i>Trichoderma</i><br>strain #5001 | Transcript ID<br><i>Trichoderma</i><br>strain #5029 | Size<br>(bp) | Forward primer (5'-3')   | Reverse primer (5'-3') |
|-------------|-----------------------------------------------------|-----------------------------------------------------|--------------|--------------------------|------------------------|
| <i>bgn</i>  | 4761                                                | 6905                                                | 137          | AACAAGCTCAACCATGCGTA     | GGCATGTCATCCTTGTTGTT   |
| <i>act</i>  | 7320                                                | 562                                                 | 89           | CTGGCACCACACCTTCTACA     | TGGACTTGGGGTTGATGG     |
| <i>chit</i> | 4269                                                | 7447                                                | 103          | GGAACCCAAACTCGAAACAA     | TCGTCGTCATCGCAATAAAA   |
| <i>endo</i> | 7128                                                | 4923                                                | 136          | CCTGCAGATTTGGTCACGTC     | CATCGTTCCAGGAATCATCA   |
| <i>qid</i>  | 3183                                                | 107                                                 | 83           | GCTCCTTTGCTACCTGGAAC     | CGACTTGGTCTTGGAGTCGT   |
| <i>prb</i>  | 8501                                                | 5207                                                | 112          | GCCTCCGTTGATGCAGATTCCCAT | TCCAAGTGTGCGATGTTGTACG |
| <i>tef</i>  | 509                                                 | 1382                                                | 103          | TGAGAAGTTCGAGAAGGAAGC    | GATGGTGATAACCACGCTCAC  |
| <i>pra</i>  | 5419                                                | 2538                                                | 101          | GTCTACCCTGCCTCCCAGAT     | TAGGACGGGTTACGATGAT    |

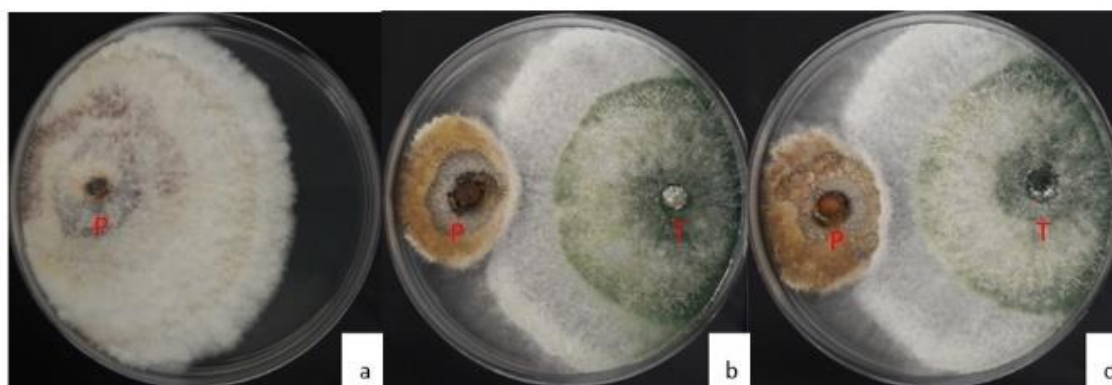

**Figure S1.** Growth inhibitory effect of the b) *Trichoderma* strain #5001, c) strain #5029 on *P. noxium* strain B after 5 days of inoculation in dual culture (T: *Trichoderma* and P: *P. noxium*), a) *P. noxium* strain B grown alone.

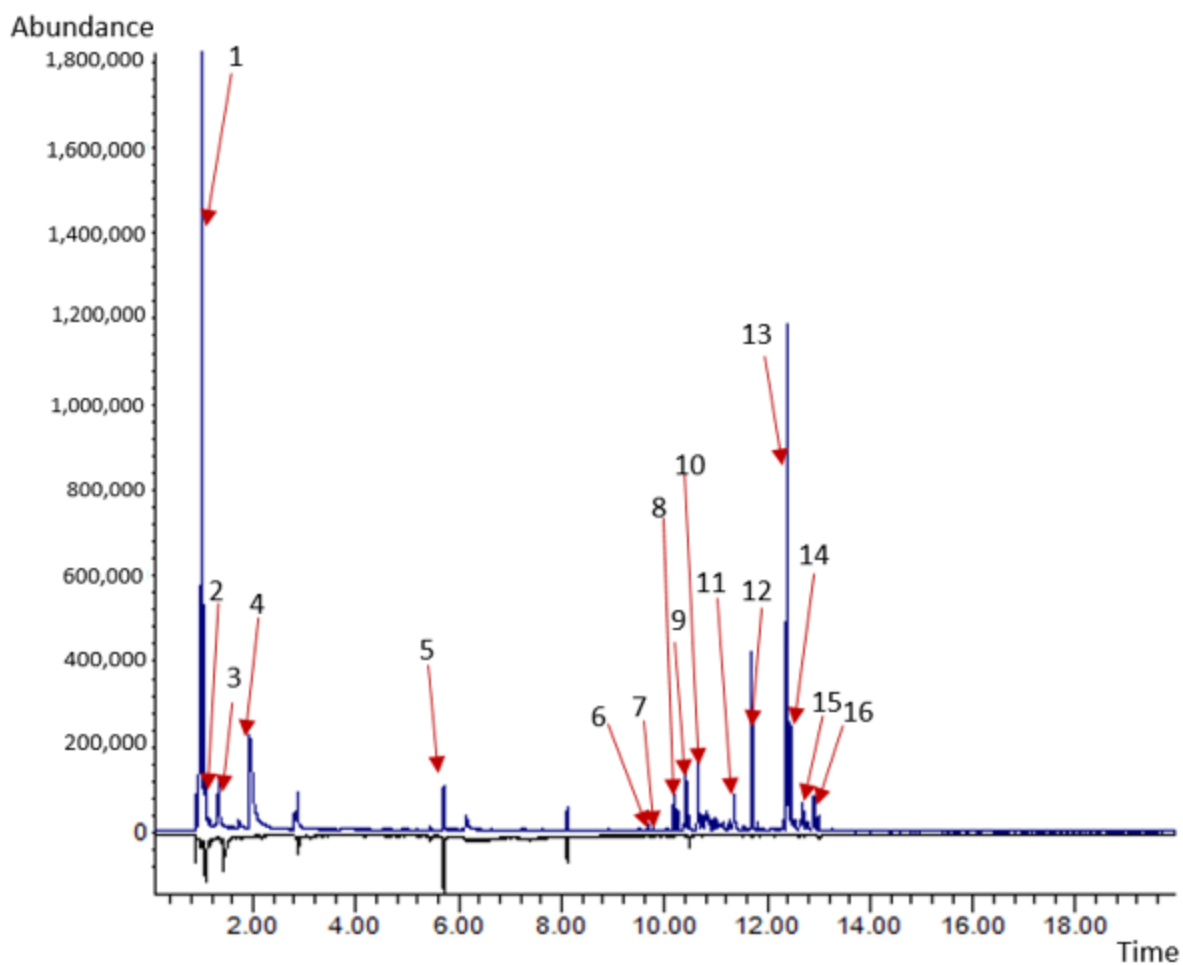

**Figure S2.** Chromatogram of volatile compounds produced by *P. noxium* strain B (above zero level); chromatogram of volatile compounds detected in the PDA media control (below zero level). Numbers refer to compounds listed in Table S2

**Table S2.** Volatile compounds produced by *P. noxium* strain B tentatively identified through SPEM GC/MS analysis

| Peak number | Compounds             | Class         | Retention time | Area % |
|-------------|-----------------------|---------------|----------------|--------|
| 1           | Ethanol               | Alcohol       | 1.02           | 28.47  |
| 2           | Furan                 | Furans        | 1.06           | 2.88   |
| 3           | Isobutanol            | Alcohol       | 1.32           | 2.47   |
| 4           | Isopentanol           | Alcohol       | 1.94           | 11.51  |
| 5           | limonene              | monoterpene   | 6.14           | 1.01   |
| 5           | $\beta$ - necoclovene | Sesquiterpene | 9.69           | 0.31   |
| 6           | Aristolene            | Sesquiterpene | 9.78           | 0.21   |
| 7           | Thujopsene            | Sesquiterpene | 10.18          | 1.61   |

|    |                                                                     |               |       |       |
|----|---------------------------------------------------------------------|---------------|-------|-------|
| 8  | 2-isopropenyl-4a,8, dimethyl-1,2,3,4a,5,6,7<br>octahydronaphthalene | Sesquiterpene | 10.42 | 2.55  |
| 9  | $\delta$ -gurjunene                                                 | Sesquiterpene | 10.65 | 3.35  |
| 10 | $\beta$ -elemene                                                    | Sesquiterpene | 11.36 | 1.34  |
| 11 | $\beta$ -caryophyllene                                              | Sesquiterpene | 11.70 | 8.14  |
| 12 | 8-isopropenyl-1,5-dimethyl-cyclodeca-1,5-diene                      | Sesquiterpene | 12.39 | 22.93 |
| 13 | unidentified sesquiterpene                                          | Sesquiterpene | 12.45 | 5.27  |
| 14 | Cadinene                                                            | Sesquiterpene | 12.68 | 1.29  |
| 15 | Elixene                                                             | Sesquiterpene | 12.91 | 1.83  |

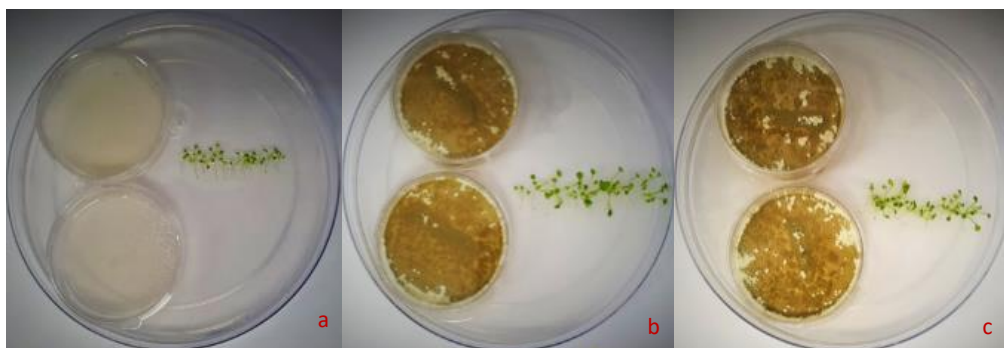

**Figure S3.** Effect of volatile compounds on the growth of *Arabidopsis thaliana* in a shared atmosphere with *Trichoderma* strains #5001 and #5029 for 12 days. (a) Control plants exposed to PDA medium, (b) plants exposed to *Trichoderma* strain #5001 and (c) plants exposed to the strain #5029.
